# Supplementary material for: Crown-ether functionalised second coordination sphere palladium catalysts by molecular imprinting
Source: Royal Society of Chemistry journal article supplement (doi:10.1039/b309072h), 2003-01-01
Supplement: b309072h.doc [file b309072h.doc]

SUPPORTING INFORMATION

Crown-ether functionalised second coordination sphere palladium catalysts by molecular imprinting

Florian Viton, Peter S. White and Michel R. Gagné*

Department of Chemistry, University of North Carolina at Chapel Hill, Chapel Hill, NC 27599-3290, USA

E-mail: [mgagne@unc.edu](mailto:mgagne@unc.edu)

**General Methods.** Unless otherwise noted, all chemicals were obtained from Aldrich and used without further purification. Potassium carbonate, rubidium carbonate, cesium carbonate, sodium carbonate and lithium carbonate were stored in dessicators over anhydrous calcium carbonate. Starting materials (PP)PdCl2 were prepared by reaction of dppe or (isopropenyl dppe)[[1]](#footnote-2) with (CH3CN)2PdCl2 in CH2Cl2. Commercially available 4’-vinylbenzo-18-crown-6 was conveniently prepared by the reaction of 4’-bromobenzo-18-crown-6 with ethylene (150 psi) in the presence of Pd(OAc)2 and tri-*o*-tolylphosphine (60°C, 30 min).

Synthesis of Pd complexes **1**-**3** were performed in air using non-distilled solvents.

For polymerisations, chlorobenzene was distilled from P2O5 and freeze-pump-thaw degassed and stored under N2 at -35°C. 2,2'-Azobis(isobutyro)nitrile (AIBN) was recrystallised from MeOH, dried in vacuo, and stored under N2 at -35°C. EDMA was washed twice with aqueous 1M NaOH and once with brine to remove inhibitor, dried over MgSO4, filtered, distilled (105°C/1 mmHg), freeze-pump-thaw degassed, and stored under N2 at -35°C. Polymerisations were performed in an MBraun Lab-Master 100 glovebox. During polymer experiments, Soxhlet extractions were performed for at least 16 h. Polymer intermediates in a reaction sequence were dried in vacuo for at least 2 h before use in subsequent reaction step. The presence of soluble organic products in a solution obtained from Soxhlet extraction of a polymer was double checked by 1H and 31P NMR in CD2Cl2 then acetone-*d*6 after removal of the solvent in vacuo.

Catalysis experiments were carried out under N2 atmosphere using standard Schlenk techniques. Tetrahydrofuran and 1,4-dioxane were distilled from sodium-benzophenone ketyl prior to use. 1,4-dioxane/H2O solutions were freeze-pump-thaw degassed prior to use.

NMR spectra were recorded on a *Bruker Avance400* spectrometer. Chemical shifts are reported in ppm and referenced to residual solvent peaks (1H and 13C NMR) or to an external standard (85% H3PO4, 31P NMR).

Gas Chromatography (GC) was performed on a *Hewlett Packard 6890* gas chromatograph using a *HP-5* column. Retention times (*t*R) are given in minutes (min).

Polymer analyses were performed by Robertson Microlit Laboratories, Madison, NJ (Pd quantitation by ICP).

Elemental microanalyses were performed by Complete Analysis Laboratories, Parsippany, NJ.

**Synthesis and characterisation of Palladium complexes 1-3**

**Pd monomer 1**. To a suspension of (isopropenyl dppe)PdCl2 (0.25 mmol, 190 mg) in 25 ml CH2Cl2 was added 10 ml of a red water solution containing 4,6-dinitropyrogallol (1.0 mmol, 216 mg) and KOH (2.0 mmol, 112 mg). The reaction was stirred at room temperature in air and was complete after 5h (31P NMR). After addition of 25 ml of dichloromethane, the deep red CH2Cl2 layer was separated. After extraction of the water layer with two 10 ml portions of CH2Cl2, the combined organic layers were washed with 15 ml water, dried over Na2SO4 and CH2Cl2 was reduced to *ca* 20 ml. 10 ml MeOH were added and the solvent was removed in vacuo giving **1** (209 mg, 95%) as an orange-red powder.

1H NMR (400 MHz, CD2Cl2):  9.74 (s, 1H, OH), 8.28 (s, 1H, HC5), 8.01-7.91 (m, 8H, HPPh), 7.64-7.60 (m, 12H, HPPh), 5.48 (bd, *J* 3.2, 4H, =CH2), 5.22 (dt, *J* 5.6, 1.2, 4H, =CH2), 2.74-2.66 (m, 2H, PCH2), 2.65-2.57 (m, 2H, PCH2) 2.15 (s, 6H, CH3), 2.14 (s, 6H, CH3). 31P{1H} NMR (162 MHz, CD2Cl2):  55.43 (qAB, AB 147.1, *J*AB 55.4). 13C{31P, 1H} (100 MHz, CD2Cl2):  166.7, 152.6, 145.4, 145.3, 144.4, 142.1, 132.9, 132.8, 131.2, 127.0, 126.5, 126.4, 125.6, 125.2, 115.0, 114.9, 111.4, 25.8, 24.8, 21.1. Anal. Calcd for C44H42N2P2PdO7: C, 60.11; H, 4.82; N, 3.19. Found: C, 59.89; H, 4.83; N, 3.08.

**Pd monomer 2**. *n*-butylamine (0.12 mmol, 12 l) was added to a solution of **1** (0.12 mmol, 105 mg) in 5 ml CH2Cl2. After 10 min stirring at rt, 4’-vinylbenzo-18-crown-6 (0.12 mmol, 41 mg) was added and the solution was stirred for 15 min. 2 ml of hexane were added and the solvent was slowly evaporated under vacuum giving **2** (154 mg, 99%) as a red solid.

1H NMR (400 MHz, CD2Cl2):  8.34 (s, 1H, HC5), 7.96-7.92 (m, 8H, HPPh), 7.62-7.60 (m, 12H, HPPh), 6.97 (d, *J* 2.0, 1H, HAr), 6.94 (dd, *J* 8.9, 1.9, 1H, HAr), 6.82 (d, *J* 8.4, 1H, HAr), 6.64 (dd, *J* 17.6, 10.8, 1H, =CH2), 5.61 (dd, *J* 17.6, 0.8, 1H, =CH2), 5.48 (bs, 4H, =CH2), 5.22 (bs, 4H, =CH2), 5.13 (dd, *J* 10.8, 0.8, 1H, =CH2), 4.16-4.12 (m, 4H, OCH2), 3.87-3.84 (m, 4H, OCH2), 3.71-3.69 (m, 4H, OCH2), 3.66-3.64 (m, 4H, OCH2), 3.62 (bs, 7H, OCH2+NH3), 2.74-2.67 (m, 2H, PCH2), 2.66-2.56 (m, 4H, PCH2+CH2) 2.14 (s, 12H, CH3), 1.42-1.26 (m, 4H, CH2), 0.90 (t, *J* 7.0, CH3). 31P{1H} NMR (162 MHz, CD2Cl2):  57.23 (qAB, AB 146.3, *J*AB 30.0). 13C{31P, 1H} (100 MHz, CD2Cl2):  170.6, 154.6, 145.4, 144.5, 140.2, 132.9, 132.8, 131.2, 130.7, 127.6, 127.4, 126.7, 125.8, 125.2, 116.0, 115.4, 114.0, 112.6, 71.5, 71.4, 71.3, 70.4, 69.5, 49.9, 37.1, 26.4, 25.6, 22.2, 21.0, 14.7.

**(dppe)Pd(4,6-dinitropyrogallol) 3**.To a suspension of (dppe)PdCl2 (0.25 mmol, 144 mg) in 15 ml CH2Cl2 was added 5 ml of a red water solution containing 4,6-dinitropyrogallol (0.50 mmol, 108 mg) and KOH (1.00 mmol, 56 mg). The reaction was stirred at room temperature in air and was complete after 3h (31P NMR). After addition of 10 ml of dichloromethane, the deep red CH2Cl2 layer was separated. After extraction of the water layer with two 5 ml portions of CH2Cl2, the combined organic layers were washed with 10 ml water, dried over Na2SO4 and CH2Cl2 was reduced to *ca* 15 ml. 7 ml MeOH were added and the solvent was removed in vacuo affording **3** (171 mg, 95%) as a red crystalline solid. Crystals suitable for X-ray diffraction analysis were obtained from a CH2Cl2/MeOH mixture.

1H NMR (400 MHz, CD2Cl2):  9.73 (s, 1H, OH), 8.27 (s, 1H, HC5), 8.05-7.96 (m, 8H, HPPh), 7.62-7.51 (m, 12H, HPPh), 2.74-2.67 (m, 2H, PCH2), 2.65-2.58 (m, 2H, PCH2). 31P{1H} NMR (162 MHz, CD2Cl2):  58.14 (qAB, AB 127.5, *J*AB 30.1). 13C{31P, 1H} (100 MHz, CD2Cl2):  166.5, 152.6, 144.1, 142.1, 133.0, 132.8, 131.1, 127.2, 126.5, 126.4, 125.5, 125.2, 111.5, 25.8, 24.8. Anal. Calcd for C32H26N2P2PdO7: C, 53.46; H, 3.65; N, 3.90. Found: C, 53.51; H, 3.56; N, 3.91.


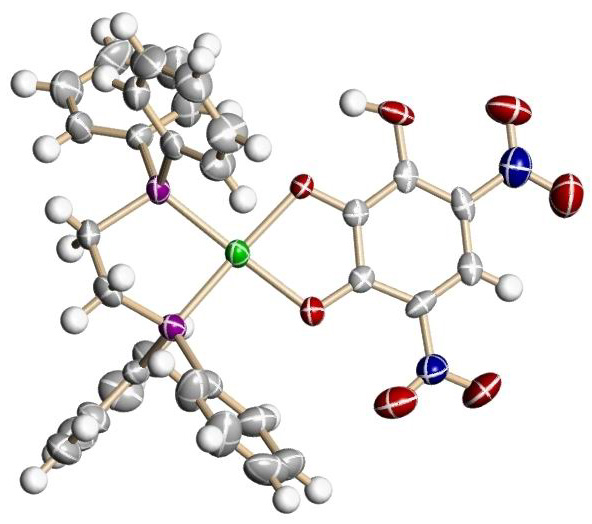


**Fig. 1/** Molecular structure of (dppe)Pd(4,6-dinitropyrogallol) **3**.

**Synthesis and characterisation of polymers *MIP-Pd* and *CE-MIP-Pd***

***MIP-Pd*.** Metallomonomer **1** (31 mg, 35 mol), AIBN (5.7 mg, 35 mol), EDMA (687 mg, 3465 mol), and PhCl (690 mg) were combined in a 20 mL scintillation vial under N2 and sealed with a Teflon-lined cap. The vial was heated to 60°C for 24 h, yielding a hard, transparent, deep red polymer which was transferred to a glass Soxhlet thimble; 25 ml of CH2Cl2 were used for Soxhlet extraction (16 h) of the polymer which was eventually dried in vacuo at 50°C for 2 h. 0.5 ml of 4N HCl in dioxane were then added to a suspension of the red polymer in CH2Cl2 (20 mL). The polymer gradually turned white-yellow while being stirred at room temperature. After 6 h, the polymer was filtered from solution and transferred to a glass Soxhlet thimble. Evaporation in vacuo of CH2Cl2 used for the clivage afforded 8 mg of a yellow-orange residue which was characterised as 4,6-dinitropyrogallol by NMR (indicating complete removal of the template). 25 ml of CH2Cl2 were used for further Soxhlet extraction (16 h) of the polymer. After drying in vacuo at 50°C for 72 h, 723 mg (48.4 mol/g, Pd) of white-yellow ***MIP-Pd*** was obtained. Anal. Calcd for ***MIP-Pd***: Pd, 0.51wt%. Found: Pd, 0.50wt%.

***CE-MIP-Pd*.** Metallomonomer **2** (54 mg, 35 mol), *n*-butylamine (3.5 l, 35 mol), 4’-vinylbenzo-18-crown-6 (12 mg, 35 mol), AIBN (5.7 mg, 35 mol), EDMA (687 mg, 3465 mol), and PhCl (690 mg) were combined in a 20 mL scintillation vial under N2 and sealed with a Teflon-lined cap. The vial was heated to 60°C for 24 h, yielding a hard, transparent, deep red polymer which was transferred to a glass Soxhlet thimble; 25 ml of CH2Cl2 were used for Soxhlet extraction (16 h) of the polymer which was eventually dried in vacuo at 50°C for 2 h. 0.5 ml of 4N HCl in dioxane were then added to a suspension of the red polymer in CH2Cl2 (20 mL). The polymer gradually turned white-yellow while being stirred at room temperature. After 6 h, the polymer was filtered from solution and transferred to a glass Soxhlet thimble. Evaporation in vacuo of CH2Cl2 used for the clivage afforded 8 mg of a yellow-orange residue which was characterised as 4,6-dinitropyrogallol by NMR (indicating complete removal of the template). 25 ml of CH2Cl2 were used for further Soxhlet extraction (16 h) of the polymer. After drying in vacuo at 50°C for 72 h, 727 mg (48.1 mol/g, Pd) of white-yellow ***CE-MIP-Pd*** was obtained. Anal. Calcd for ***CE-MIP-Pd***: Pd, 0.51wt%. Found: Pd, 0.48 wt%.

**Typical procedures for the catalysis experiments**

**Catalysis of the Suzuki reaction.** To a suspension of the P2PdCl2 containing polymer (***MIP-Pd*** or ***CE-MIP-Pd***) (54 mg, 2.6 mol) in a 3/1 mixture of 1,4-dioxane/water (1.4 ml), was added *p*-bromoanisole (33 l, 0.26 mmol) at room temperature. The mixture was stirred 5 min and K2CO3 (42 mg, 0.30 mmol) was added. After 5 min, phenyl boronic acid (24 mg, 0.20 mmol) was added and the reaction mixture was placed in a preheated oil bath at 80°C. The ratio *p*-bromoanisole/4-methoxy biphenyl was monitored by GC along the course of the reaction (50 l aliquots were withdrawn, poured in 0.5 ml CH2Cl2, dried with Na2SO4, filtered through a short silica gel pad, and analysed by GC).

GC (H2, 100°C for 3 min, 20°C/min until 200°C) : *t*R (*p*-bromoanisole) = 4.85 min; *t*R (4-methoxy biphenyl) = 8.88 min.

**Catalysis of the allylic alkylation.** To a suspension of the P2PdCl2 containing polymer (***MIP-Pd*** or ***CE-MIP-Pd***) (62 mg, 3 mol) in THF (0.9 ml) at the required temperature, was added allyl acetate (32 l, 0.3 mmol) and *n*-decane (10 l, 0.05 mmol). The mixture was stirred 5 min and a THF solution of sodium dimethyl malonate (0.6 mmol in 2.1 ml THF) was transferred dropwise to this solution by cannula. The course of the reaction was monitored by GC (50 l aliquots were withdrawn, poured in 0.5 ml CH2Cl2, filtered through a short silica gel pad, and analysed by GC; conversion was corrected for response factor differences between *n*-decane and 2-allyl-malonic acid dimethyl ester).

GC (H2, 50°C for 5 min, 10°C/min until 100°C, 100°C for 10 min, 40°C/min until 200°C,) : *t*R (*n*-decane) = 8.30 min; *t*R (2-allyl-malonic acid dimethyl ester) = 10.92 min.

1. R. A. Taylor, B. P. Santora and M. R. Gagné, *Org. Lett.*, 2000, **2**, 1781 [↑](#footnote-ref-2)
